# Supplementary material for: Insights into the electronic structure of tin(ii) pyrochlore oxides with 5s2 lone pair states as transparent p-type oxide semiconductors
Source: Royal Society of Chemistry journal article supplement (doi:10.1039/d4tc01455c), 2024-01-01
Supplement: d4tc01455c1.pdf [file d4tc01455c1.pdf]

## Supplemental Material

### Insights on the electronic structure of Tin (II) pyrochlore oxides with $5s^2$ lone pair states as transparent p-type oxide semiconductors

Jueli Shi<sup>1,2</sup>, Ziqian Sheng<sup>1,2</sup>, Yong-bin Zhuang<sup>1</sup>, Dong-Chen Qi<sup>3\*</sup>, Kelvin H.L.  
Zhang<sup>1,2\*</sup>

*<sup>1</sup>State Key Laboratory of Physical Chemistry of Solid Surfaces, Collaborative  
Innovation Center of Chemistry for Energy Materials, College of Chemistry and  
Chemical Engineering, Xiamen University, Xiamen 361005, China*

*<sup>2</sup>Shenzhen Research Institute of Xiamen University, Shenzhen 518000, China.*

*<sup>3</sup>Centre for Materials Science, School of Chemistry and Physics, Queensland  
University of Technology, Brisbane, Queensland 4001, Australia*

\*Email: [dongchen.qi@qut.edu.au](mailto:dongchen.qi@qut.edu.au); [kelvinzhang@xmu.edu.cn](mailto:kelvinzhang@xmu.edu.cn)

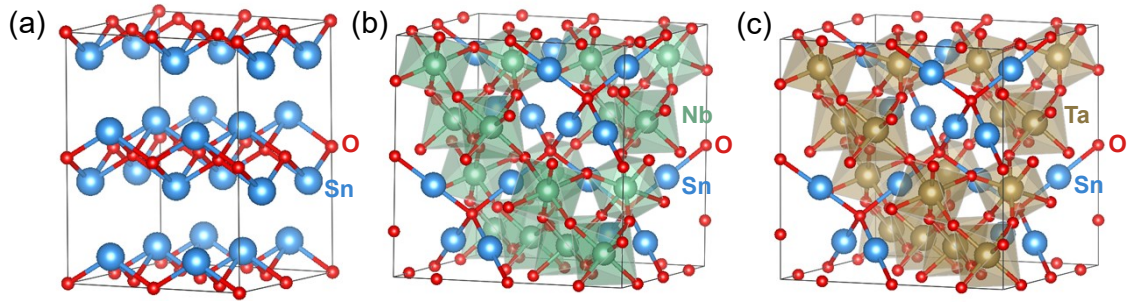

**Figure S1.** The crystal structure (a) litharge SnO; (b) pyrochlore  $\text{Sn}_2\text{Nb}_2\text{O}_7$  and (c) pyrochlore  $\text{Sn}_2\text{Ta}_2\text{O}_7$ .

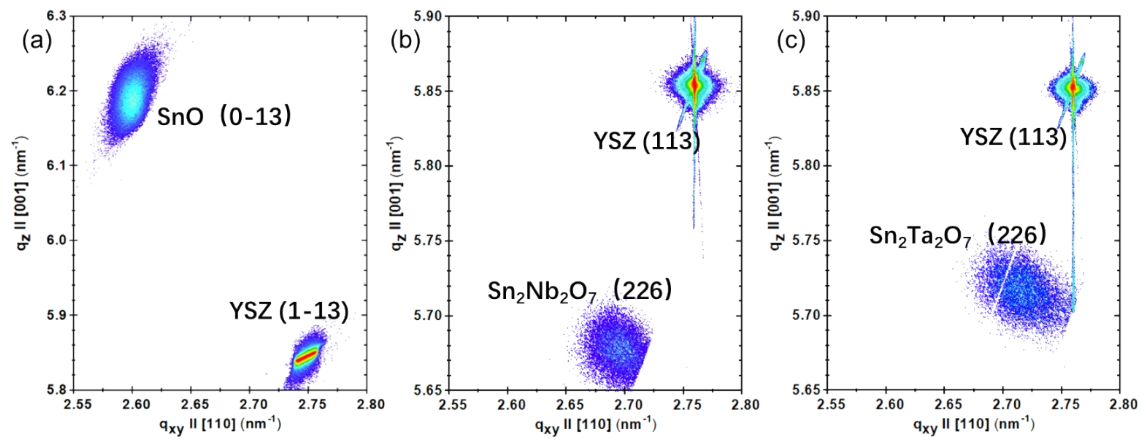

**Figure S2.** Reciprocal space mapping (RSM) of (a) SnO, (b)  $\text{Sn}_2\text{Nb}_2\text{O}_7$  and (c)  $\text{Sn}_2\text{Ta}_2\text{O}_7$  thin films grown on YSZ (001) substrate.

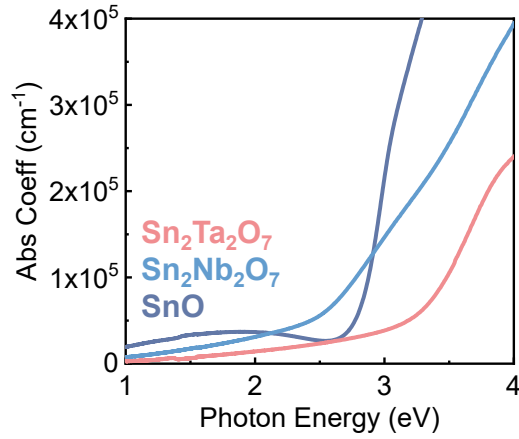

**Figure S3.** The optical absorption coefficient spectra of SnO, Sn<sub>2</sub>Nb<sub>2</sub>O<sub>7</sub> and Sn<sub>2</sub>Ta<sub>2</sub>O<sub>7</sub> thin films.

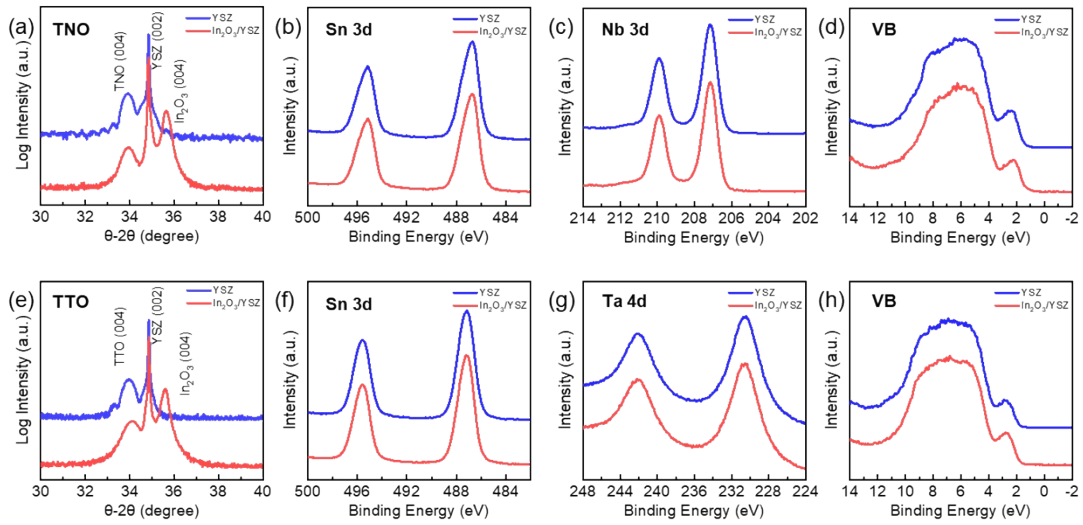

**Figure S4.** (a) X-ray diffraction (XRD) of Sn<sub>2</sub>Nb<sub>2</sub>O<sub>7</sub> (TNO) grown on YSZ (001) and In<sub>2</sub>O<sub>3</sub> thin film coated YSZ(001) substrates; (b) Sn 3d<sub>5/2</sub>, (c) Nb 3d and (d) VB XPS spectra of TNO thin films excited with photon energy of 1486 eV; (e) X-ray diffraction (XRD) of Sn<sub>2</sub>Ta<sub>2</sub>O<sub>7</sub> (TTO) grown on YSZ (001) and In<sub>2</sub>O<sub>3</sub> thin film coated YSZ (001) substrates; (b) Sn 3d<sub>5/2</sub>, (c) Nb 3d and (d) VB XPS spectra of TTO thin films excited with photon energy of 1486 eV.

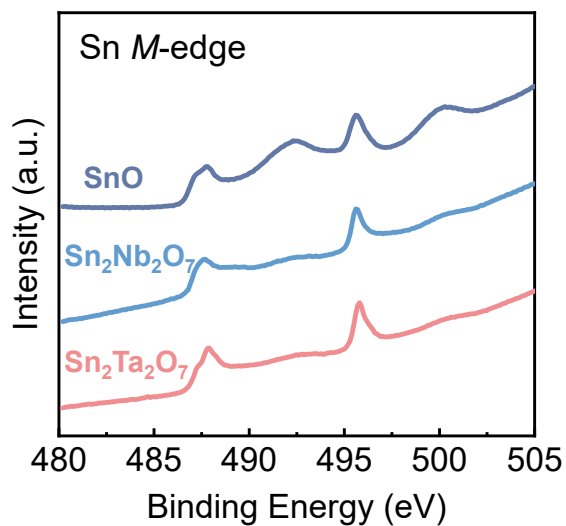

**Figure S5.** Sn M-edge XAS of SnO, Sn<sub>2</sub>Nb<sub>2</sub>O<sub>7</sub> and Sn<sub>2</sub>Ta<sub>2</sub>O<sub>7</sub>.

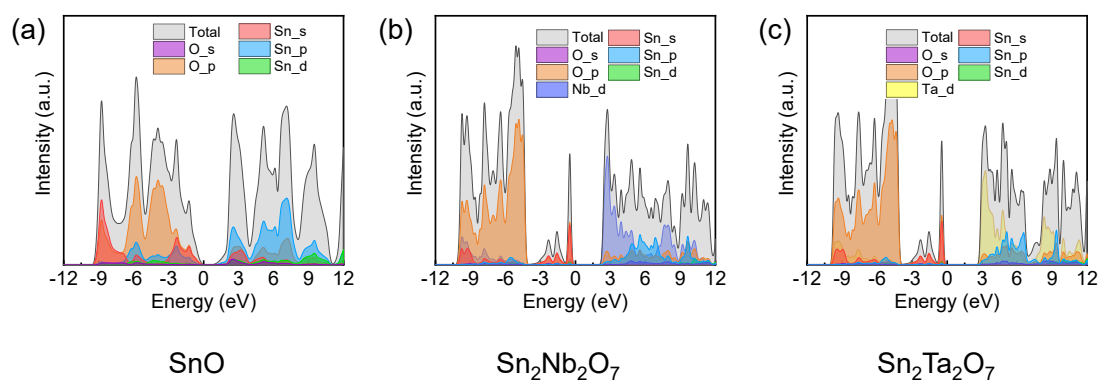

**Figure S6.** HSE06 calculated DOSs for (a) SnO, (b) Sn<sub>2</sub>Nb<sub>2</sub>O<sub>7</sub> and (c) Sn<sub>2</sub>Ta<sub>2</sub>O<sub>7</sub> from -12 eV to 12 eV.

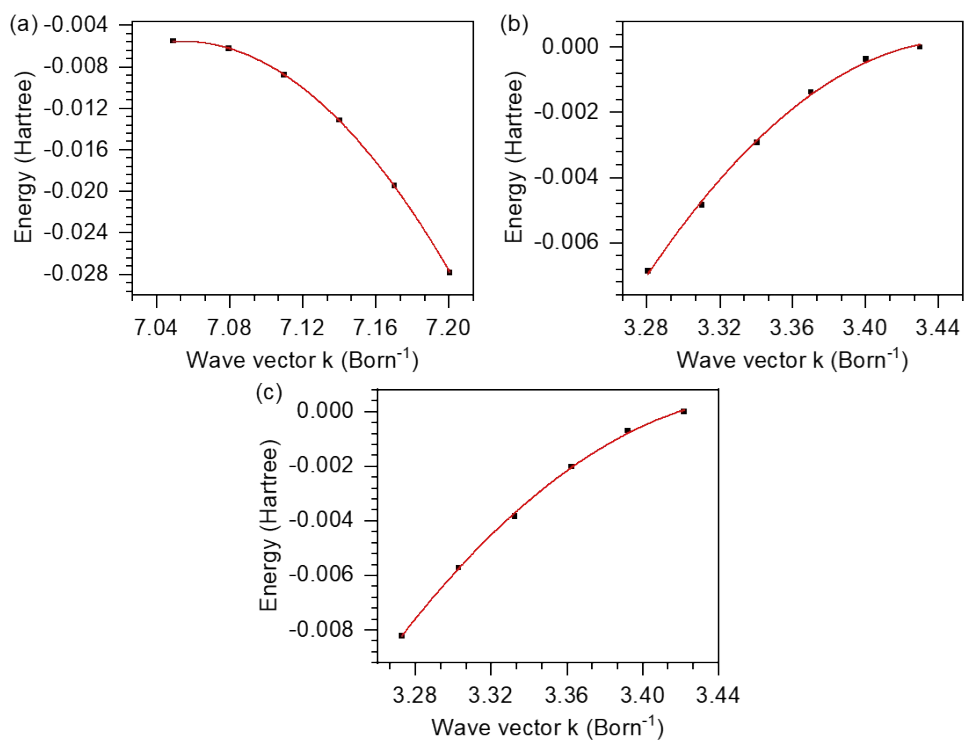

**Figure S7.** The parabolic fitting of hole effective mass at valence band maximum of (a) SnO; (b) Sn<sub>2</sub>Nb<sub>2</sub>O<sub>7</sub>; (c) Sn<sub>2</sub>Ta<sub>2</sub>O<sub>7</sub>.

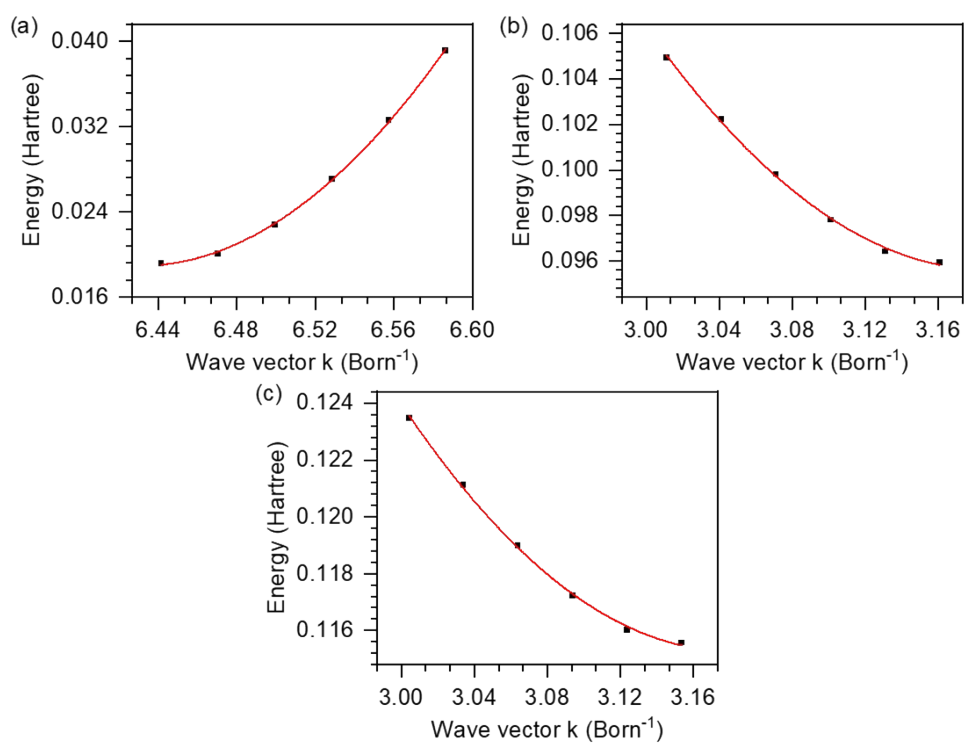

**Figure S8.** The parabolic fitting of electron effective mass at valence band maximum of (a) SnO; (b) Sn<sub>2</sub>Nb<sub>2</sub>O<sub>7</sub>; (c) Sn<sub>2</sub>Ta<sub>2</sub>O<sub>7</sub>.

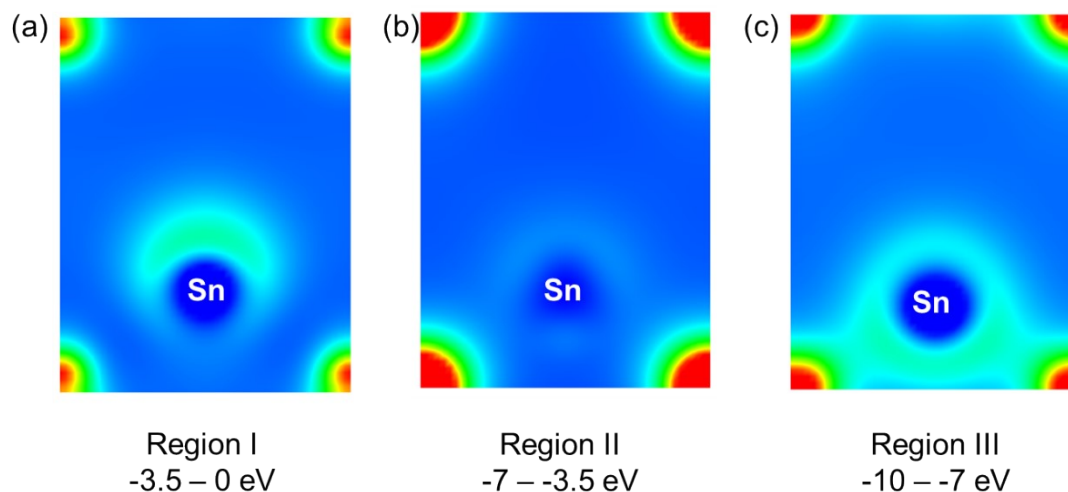

**Figure S9.** Partial electron density contour plots for litharge SnO. (a) -3.5 to 0 eV; (b) -7 to -3.5 eV (c) -10 to -7 eV.

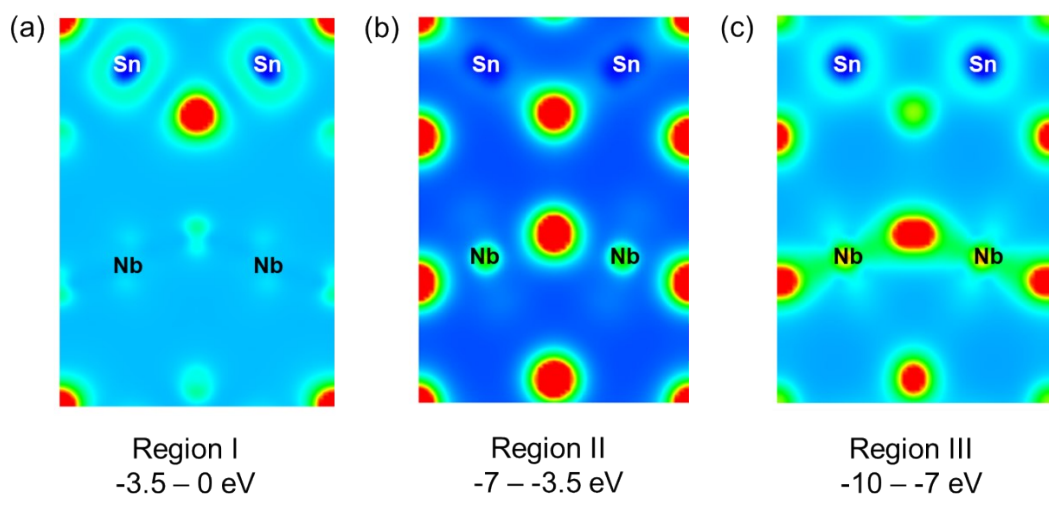

**Figure S10.** Partial electron density contour plots for pyrochlore  $\text{Sn}_2\text{Nb}_2\text{O}_7$ . (a) -3.5 to 0 eV; (b) -7 to -3.5 eV (c) -10 to -7 eV.

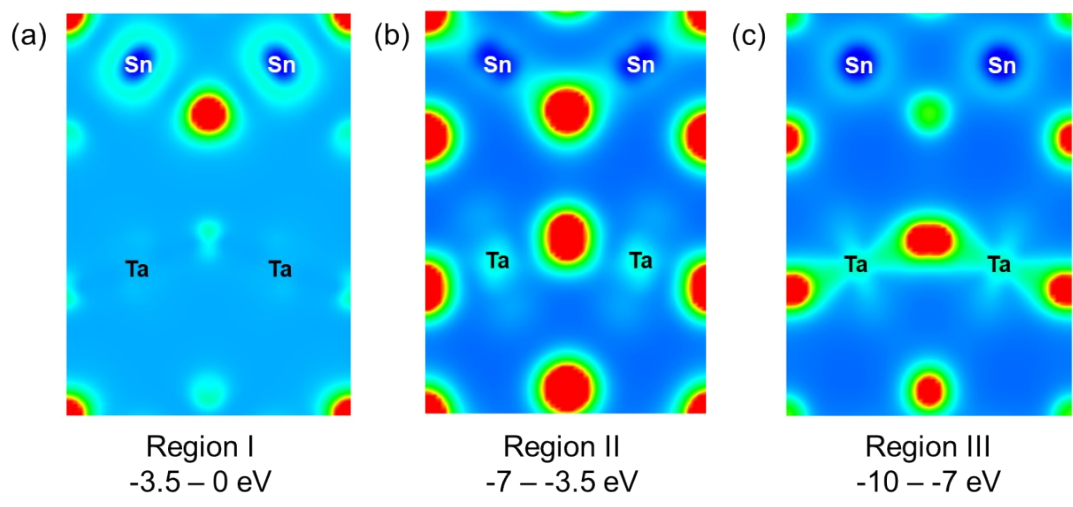

**Figure S11.** Partial electron density contour plots for pyrochlore  $\text{Sn}_2\text{Ta}_2\text{O}_7$ . (a) -3.5 to 0 eV; (b) -7 to -3.5 eV (c) -10 to -7 eV.

**Table S1** The parabolic fitting parameters of hole effective mass

| Materials                                        | Quadratic coefficient (C) of fitting | term C of | Hole effective mass $\frac{1}{2C} / m_{hole}^*$ | R-square (R <sup>2</sup> ) of fitting | Direction |
|--------------------------------------------------|--------------------------------------|-----------|-------------------------------------------------|---------------------------------------|-----------|
| <b>SnO</b><br>(Tetragonal)                       | -1.008±0.013                         |           | 0.496                                           | 0.9999                                | Γ-Z       |
| <b>Sn<sub>2</sub>Nb<sub>2</sub>O<sub>7</sub></b> | -0.239±0.026                         |           | 2.092                                           | 0.9983                                | Γ-L       |
| <b>Sn<sub>2</sub>Ta<sub>2</sub>O<sub>7</sub></b> | -0.224±0.019                         |           | 2.232                                           | 0.9993                                | Γ-L       |

**Table S2** The parabolic fitting parameters of electron effective mass

| Materials                                        | Quadratic coefficient (C) of fitting | term C of | Electron effective mass $\frac{1}{2C} / m_{elec}^*$ | R-square (R <sup>2</sup> ) of fitting | Direction |
|--------------------------------------------------|--------------------------------------|-----------|-----------------------------------------------------|---------------------------------------|-----------|
| <b>SnO</b><br>(Tetragonal)                       | 0.624±0.098                          |           | 0.801                                               | 0.9991                                | Γ-M       |
| <b>Sn<sub>2</sub>Nb<sub>2</sub>O<sub>7</sub></b> | 0.301±0.028                          |           | 1.661                                               | 0.9988                                | Γ-K       |
| <b>Sn<sub>2</sub>Ta<sub>2</sub>O<sub>7</sub></b> | 0.265±0.026                          |           | 1.887                                               | 0.9988                                | Γ-K       |



**Table S3.** Comparison of lattice parameters of epitaxial SnO, Sn<sub>2</sub>Nb<sub>2</sub>O<sub>7</sub> and Sn<sub>2</sub>Ta<sub>2</sub>O<sub>7</sub> thin films with their bulk values.

| Materials                                      | In-Plane (Å) | Out-of-Plane (Å) | Bulk values (Å) |
|------------------------------------------------|--------------|------------------|-----------------|
| SnO<br>(Tetragonal)                            | a=3.84       | c=4.85           | a=3.80, c=4.84  |
| Sn <sub>2</sub> Nb <sub>2</sub> O <sub>7</sub> | a=10.49      | a=10.57          | a=10.58         |
| Sn <sub>2</sub> Ta <sub>2</sub> O <sub>7</sub> | a=10.42      | a=10.49          | a=10.48         |

**Table S4.** The parabolic fitted effective mass of electrons and holes at different k-points in the Brillion zone for SnO, Sn<sub>2</sub>Nb<sub>2</sub>O<sub>7</sub> and Sn<sub>2</sub>Ta<sub>2</sub>O<sub>7</sub>. The directions of the carriers' movement are also listed behind the effective mass value.

| Material                                       |          | Effective mass<br>/ $m_e$ | Direction   |
|------------------------------------------------|----------|---------------------------|-------------|
| SnO                                            | Electron | 0.80                      | M- $\Gamma$ |
|                                                | Hole     | 0.50                      | $\Gamma$ -Z |
| Sn <sub>2</sub> Nb <sub>2</sub> O <sub>7</sub> | Electron | 1.66                      | $\Gamma$ -K |
|                                                | Hole     | 2.09                      | L- $\Gamma$ |
| Sn <sub>2</sub> Ta <sub>2</sub> O <sub>7</sub> | Electron | 1.89                      | $\Gamma$ -K |
|                                                | Hole     | 2.23                      | L- $\Gamma$ |
